# Supplementary material
Source: Springer Nature journal article supplement (https://www.springermedizin.de/resource/supplementary/13018_2013_364_MOESM5_ESM.pdf/9636866)

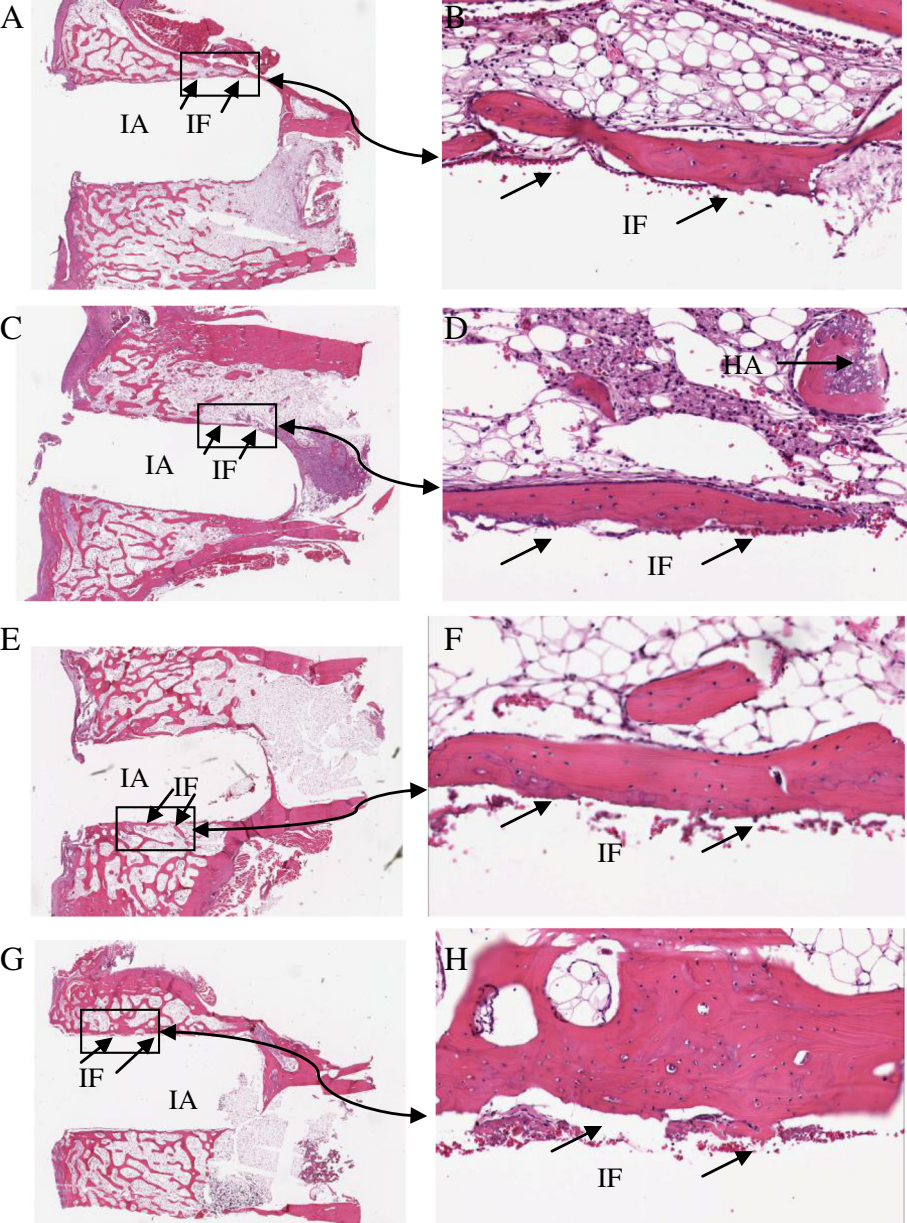

Supplement: MOESM5 [file 9636866]
